# Supplementary material for: Assessment of the Water Footprint in Low-Income Urban Neighborhoods from Developing Countries: Case Study Fátima (Gamarra, Colombia)
Source: MDPI journal article supplement (doi:10.3390/su15097115), 2023-04-24
Supplement: s1 [file s1]

# Assessment of the Water Footprint in Low-Income Urban Neighborhoods from Developing Countries: Case Study Fátima (Gamarra, Colombia)

Brayan Alexis Parra-Orobio <sup>1,2</sup>, Jonathan Soto-Paz <sup>3</sup>, Anulfo Ramos-Santos <sup>2</sup>, Keiner Fernando Sanjuan-Quintero <sup>2</sup>, Rossember Saldaña-Escorcía <sup>2</sup>, Isabel Cristina Dominguez-Rivera <sup>1</sup> and Antoni Sánchez <sup>4,\*</sup>

<sup>1</sup> Grupo de Investigación en Recurso Hídrico y Saneamiento Ambiental-GPH, Facultad de Ingenierías Fisico-mecánicas, Universidad Industrial de Santander, Carrera 27 Calle 9 Ciudad Universitaria, Bucaramanga 680002, Colombia; brayan.parra@correo.uis.edu.co (B.A.P.-O.); isabeldr@uis.edu.co (I.C.D.-R.)

<sup>2</sup> Grupo de Investigación Gestión Ambiental y Territorios Sostenibles-GE&TES, Facultad de Ingenierías y Tecnologías, Universidad Popular del Cesar, Seccional Aguachica, Carrera 40 # 1Norte-58, Aguachica 25010, Colombia; aramoss@unicesar.edu.co (A.R.-S.); kfsanjuan@unicesar.edu.co (K.F.S.-Q.); rsaldanae@unicesar.edu.co (R.S.-E.)

<sup>3</sup> Grupo de Investigación en Amenazas, Vulnerabilidad y Riesgos a Fenómenos Naturales, Facultad de Ingeniería, Universidad de Investigación y Desarrollo, Calle 9 # 23-55, Bucaramanga 680002, Colombia; jsoto3@udi.edu.co

<sup>4</sup> Composting Research Group, Department of Chemical Engineering, Autonomous University of Barcelona, 08193 Barcelona, Spain

\* Correspondence: antoni.sanchez@uab.cat

---

## 2. Materials and Methods

### 2.1. Sample size

Water consumption in the Fátima was estimated following a strategy proposed by García and Toro [1], consisting of a household survey applied to a population sample during July 2022 to capture information on socioeconomic conditions and water consumption patterns. The questionnaire used was designed by García and Toro [1] and validated by lecturers from Universidad Popular del Cesar – Aguachica (Colombia) with expertise in water resources. The questionnaire included closed and open questions. The sample size was established through simple random probability sampling. Thus, the entire population has the same probability of being part of the sample [2]. For this, Equation S1 was used to obtain an initial sample size.

$$n = \frac{N * Z^2 * P * Q}{e^2 * (N - 1) + Z^2 * P * Q} \quad (S1)$$

n= Sample size.

N= Population size.

Z<sup>2</sup>= Statistical parameter dependent on the confidence level.

P= Probability of occurrence of the studied event.

Q= (1-p) probability of non-occurrence of the studied event.

e<sup>2</sup>= Maximum accepted population error.

Since the studied population was relatively small, a maximum error of 10% and a confidence level of 95% were selected (Z = 1.96). Regarding Q, 50% was selected since this value allows calculating the maximum possible value of the sample size (n).

---

$$n = \frac{137 * 1.96^2 * 0.5 * 0.5}{0.05^2 * (137 - 1) + 1.96^2 * 0.5 * 0.5} = 101.2 \text{ households} \approx 101 \text{ households}$$

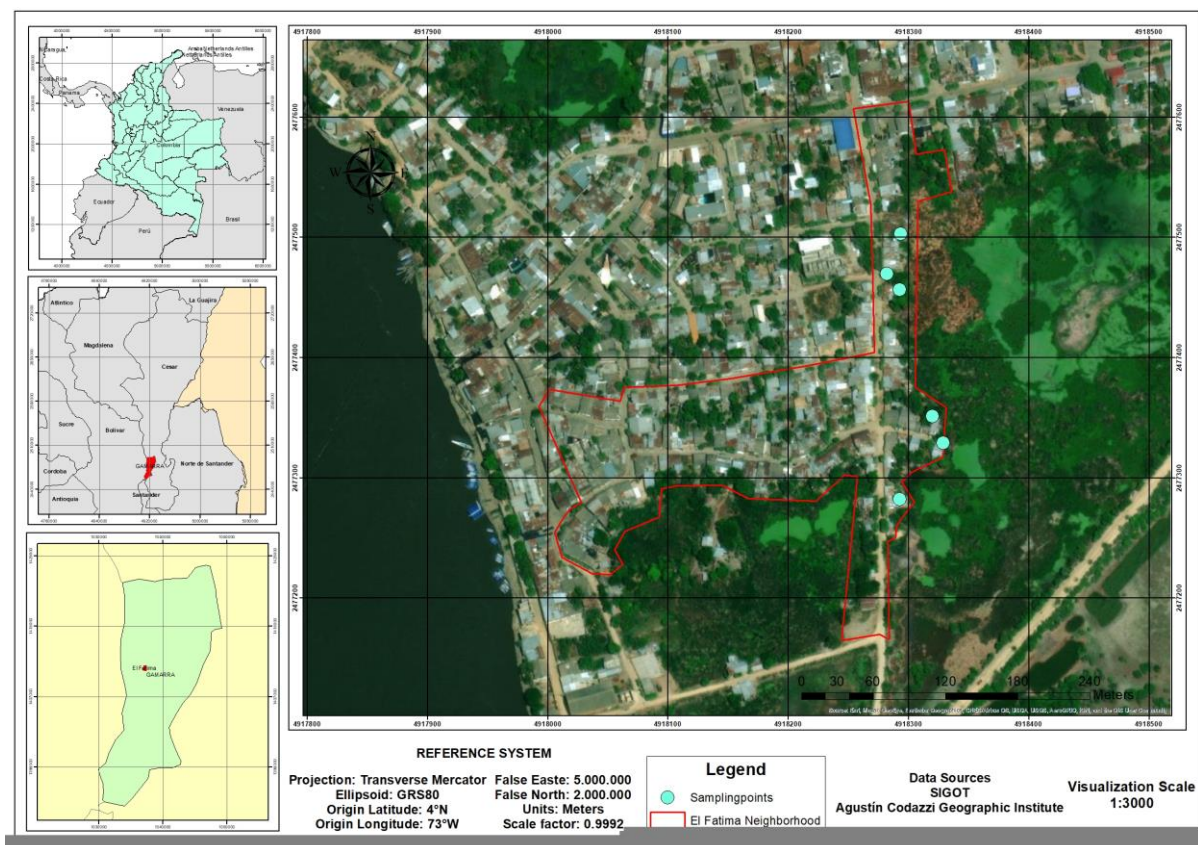

**Figure S1.** Sampling points of water quality monitoring in the critical areas of pollution in the Baquero wetland.

### 3. Results

Figure S2 shows the number of inhabitants according to socioeconomic stratum and Figure S3 shows the distribution of the population (adults and children) according to socioeconomic stratum

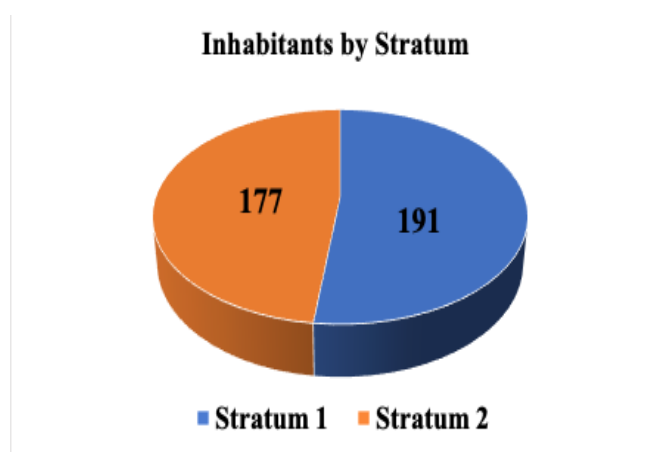

**Figure S2.** Number of inhabitants according to socioeconomic stratum.

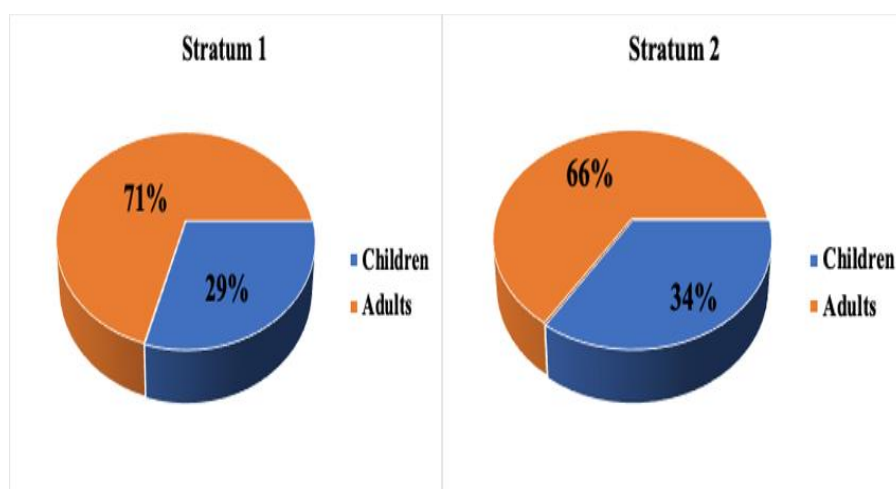

**Figure S3.** Distribution of the population (adults and children) according to socioeconomic stratum.

Figure S4 shows the distribution of pets according to stratum, which has similarities in both strata.

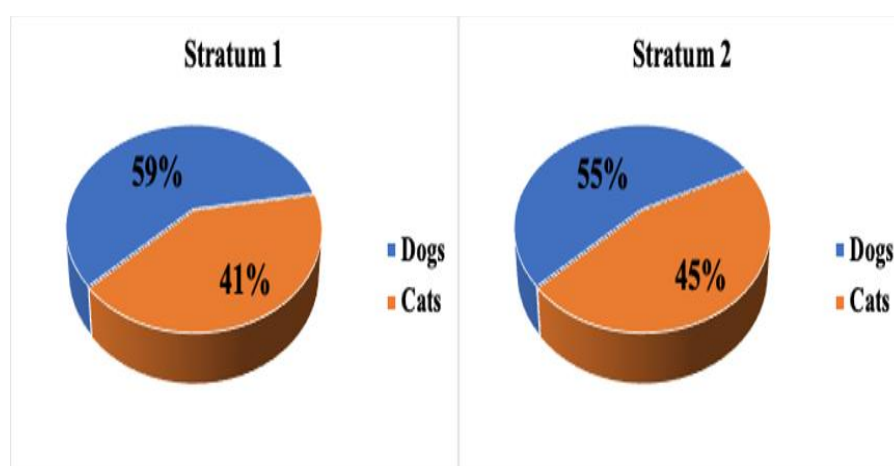

**Figure S4.** Distribution of the pet population according to socioeconomic stratum.

Table S1 includes the mean water footprint values by activities and stratum.

**Table S1.** Mean ( $\mu$ ) of the water footprint according to activities and stratum ( $\text{m}^3/\text{month}$ ).

| N°           | Activities                   | Stratum 1    | Stratum 2    |
|--------------|------------------------------|--------------|--------------|
| 1            | Water consumed by children   | 0.034        | 0.031        |
| 2            | Water consumed by adults     | 0.158        | 0.130        |
| 3            | Water used for cooking       | 0.303        | 0.263        |
| 4            | Water consumed by dogs       | 0.012        | 0.011        |
| 5            | Water consumed by cats       | 0.004        | 0.004        |
| 6            | Water used in brushing teeth | 1.111        | 0.582        |
| 7            | Handwashing                  | 2.528        | 1.155        |
| 8            | Face washing                 | 1.793        | 0.871        |
| 9            | Water used for shaving       | 0.047        | 0.023        |
| 10           | Water used in the shower     | 29.872       | 12.815       |
| 11           | Water used in toilet         | 7.117        | 3.261        |
| 12           | General household cleaning   | 0.943        | 0.329        |
| 13           | Clothes washing              | 4.354        | 1.662        |
| 14           | Washing dishes               | 23.620       | 13.766       |
| 15           | Garden irrigation            | 0.226        | 0.062        |
| 16           | Car washing                  | 0.182        | 0.131        |
| <b>Total</b> |                              | <b>4.519</b> | <b>2.193</b> |

**Table S2.** Pearson correlation matrix for Water Footprint types.

|                                 | WF <sub>green</sub> | WF <sub>blue</sub> | WF <sub>graywi</sub><br>thsink | WF <sub>graywithout</sub><br>sink | WF <sub>graywithout</sub><br>shower | WF <sub>graywithsho</sub><br>wer | WF <sub>graycleaning</sub> | WF <sub>grayothers</sub> |
|---------------------------------|---------------------|--------------------|--------------------------------|-----------------------------------|-------------------------------------|----------------------------------|----------------------------|--------------------------|
| WF <sub>green</sub>             | 1                   | 0.78               | 0.63                           | 0.91                              | 0.77                                | 0.67                             | -0.45                      | -0.34                    |
| WF <sub>blue</sub>              | 0.78                | 1                  | 0.92                           | 0.73                              | 0.59                                | 0.9                              | -0.52                      | -0.48                    |
| WF <sub>graywithsink</sub>      | 0.63                | 0.92               | 1                              | 0.64                              | 0.7                                 | 0.85                             | -0.66                      | -0.75                    |
| WF <sub>graywithoutsink</sub>   | 0.91                | 0.73               | 0.64                           | 1                                 | 0.81                                | 0.69                             | -0.44                      | -0.33                    |
| WF <sub>graywithoutshower</sub> | 0.77                | 0.59               | 0.7                            | 0.81                              | 1                                   | 0.92                             | -0.79                      | -0.35                    |
| WF <sub>graywithshower</sub>    | 0.67                | 0.9                | 0.85                           | 0.69                              | 0.92                                | 1                                | -0.57                      | -0.66                    |
| WF <sub>graycleaning</sub>      | -0.45               | -0.52              | -0.66                          | -0.44                             | -0.79                               | -0.57                            | 1                          | 0.72                     |
| WF <sub>grayothers</sub>        | -0.34               | -0.48              | -0.75                          | -0.33                             | -0.35                               | -0.66                            | 0.72                       | 1                        |

WF<sub>green</sub>: Green Water Footprint; WF<sub>gray</sub>: Gray Water Footprint; WF<sub>blue</sub>: Blue Water Footprint

**Table S3.** Pearson correlation matrix for Blue Water Footprint types.

|       | VWCC   | VWCA   | VWUC  | VWCD   | VWCCo  |
|-------|--------|--------|-------|--------|--------|
| VWCC  | 1      | 0.470  | 0.165 | -0.044 | -0.033 |
| VWCA  | 0.470  | 1      | 0.214 | 0.111  | -0.058 |
| VWUC  | 0.165  | 0.214  | 1     | 0.045  | -0.15  |
| VWCD  | -0.044 | 0.111  | 0.045 | 1      | 0.065  |
| VWCCo | -0.033 | -0.058 | -0.15 | 0.065  | 1      |

VWCC: Volume of water consumed by children; VWCA: Volume of water consumed by adults; VWUC: Volume water used by cats; VWCD: Volume water used by dogs; VWCCo: Volume of water consumed for cooking

**Table S4.** Pearson correlation matrix for the types of Green Water Footprints.

|                                  | WF <sub>greenfruits</sub> | WF <sub>greenvegetables</sub> | WF <sub>greencarbohydrates</sub> | WF <sub>greendrinks</sub> | WF <sub>greenmeat</sub> | WF <sub>greenmilk</sub> | WF <sub>greeneeggs</sub> |
|----------------------------------|---------------------------|-------------------------------|----------------------------------|---------------------------|-------------------------|-------------------------|--------------------------|
| WF <sub>greenfruits</sub>        | 1                         | 0.152                         | 0.234                            | -0.069                    | 0.229                   | 0.345                   | 0.268                    |
| WF <sub>greenvegetables</sub>    | 0.152                     | 1                             | 0.055                            | -0.032                    | 0.284                   | 0.138                   | 0.033                    |
| WF <sub>greencarbohydrates</sub> | 0.234                     | 0.055                         | 1                                | -0.07                     | 0.009                   | 0.095                   | 0.329                    |
| WF <sub>greendrinks</sub>        | -0.069                    | -0.032                        | -0.07                            | 1                         | 0.029                   | 0.016                   | -0.004                   |
| WF <sub>greenmeat</sub>          | 0.229                     | 0.284                         | 0.009                            | 0.029                     | 1                       | 0.041                   | 0.036                    |
| WF <sub>greenmilk</sub>          | 0.345                     | 0.138                         | 0.095                            | 0.016                     | 0.041                   | 1                       | 0.16                     |
| WF <sub>greeneeggs</sub>         | 0.268                     | 0.033                         | 0.329                            | -0.004                    | 0.036                   | 0.16                    | 1                        |

WF<sub>green</sub>: Green Water Footprints

**Table S5.** Pearson correlation matrix for the types of Gray Water Footprints.

|                                    | WF <sub>graypersonal_hygiene</sub> | WF <sub>grayshower_toilet</sub> | WF <sub>graycleaning</sub> | WF <sub>grayothers</sub> |
|------------------------------------|------------------------------------|---------------------------------|----------------------------|--------------------------|
| WF <sub>graypersonal_hygiene</sub> | 1                                  | 0.353                           | 0.062                      | -0.025                   |
| WF <sub>grayshower_toilet</sub>    | 0.353                              | 1                               | 0.245                      | -0.056                   |
| WF <sub>graycleaning</sub>         | 0.062                              | 0.245                           | 1                          | 0.005                    |
| WF <sub>grayothers</sub>           | -0.025                             | -0.056                          | 0.005                      | 1                        |

WF<sub>gray</sub>: Gray Water Footprints

## References

1. García SIN, Toro MJ. Evaluación de la Huella Hídrica Generada por los Sectores Comerciales y Vivienda del Barrio La Florida (Bogotá D.C.). Ingeniería Ambiental. Bogotá D.C.: Universidad de Libre 2013.
2. Montgomery DC. Diseño y Análisis de Experimentos. México D.F.: John Wiley & Sons; 2004.

**Disclaimer/Publisher's Note:** The statements, opinions, and data contained in all publications are solely those of the individual author(s) and contributor(s) and not of MDPI and/or the editor(s). MDPI and/or the editor(s) disclaim responsibility for any injury to people or property resulting from any ideas, methods, instructions or products referred to in the content.
